# Supplementary material for: Warming Decreases Bioconversion of Polyunsaturated Fatty Acids in Chironomid Larvae Maintained on Cyanobacterium Microcystis
Source: MDPI journal article supplement (doi:10.3390/biom11091326), 2021-09-07
Supplement: s1 [file s1]

# Electronic Supplementary Material

## **Warming decreases bioconversion of polyunsaturated fatty acids in chironomid larvae maintained on cyanobacterium *Microcystis***

Ursula Strandberg<sup>1\*</sup>, Timo Ilo<sup>1</sup>, Jarkko Akkanen<sup>1</sup>, Paula Kankaala<sup>1</sup>

<sup>1</sup> University of Eastern Finland, Department of Environmental and Biological Sciences, Joensuu, Finland

\*Corresponding author (ursula.strandberg@uef.fi)

Table S1. Pairwise comparisons of ARA w% in *Chironomus* (based on estimated marginal means) fed with *Micro20*, *Micro25* or Tetramin<sup>®</sup> diet at different experimental temperatures (20 °C and 25 °C). Diets with significant difference between the experimental temperatures are bolded.

| Diet                  | (I)<br>Experimental<br>temperature | (J)<br>Experimental<br>temperature | Mean<br>Difference<br>(I-J) | Std.<br>Error | Sig. <sup>b</sup> | 95% Confidence<br>Interval for<br>Difference <sup>b</sup> |                |
|-----------------------|------------------------------------|------------------------------------|-----------------------------|---------------|-------------------|-----------------------------------------------------------|----------------|
|                       |                                    |                                    |                             |               |                   | Lower<br>Bound                                            | Upper<br>Bound |
| <b><i>Micro20</i></b> | <b>20 °C</b>                       | <b>25 °C</b>                       | <b>2.020</b>                | <b>0.507</b>  | <b>0.001</b>      | <b>0.971</b>                                              | <b>3.069</b>   |
| <b><i>Micro25</i></b> | <b>20 °C</b>                       | <b>25 °C</b>                       | <b>2.019</b>                | <b>0.507</b>  | <b>0.001</b>      | <b>0.970</b>                                              | <b>3.068</b>   |
| Tetramin              | 20 °C                              | 25 °C                              | -0.052                      | 0.538         | 0.924             | -1.164                                                    | 1.061          |

b. Adjustment for multiple comparisons: LSD (equivalent to no adjustments).

Table S2. Pairwise comparisons of arcsine square root transformed EPA w% in *Chironomus* (based on estimated marginal means) fed with *Micro20*, *Micro25* or Tetramin<sup>®</sup> diet at different experimental temperatures (20 °C and 25 °C). Diet with significant difference between the experimental temperatures is bolded.

| Diet                  | (I)<br>Experimental<br>temperature | (J)<br>Experimental<br>temperature | Mean<br>Difference<br>(I-J) | Std.<br>Error | Sig. <sup>b</sup> | 95% Confidence<br>Interval for<br>Difference <sup>b</sup> |                |
|-----------------------|------------------------------------|------------------------------------|-----------------------------|---------------|-------------------|-----------------------------------------------------------|----------------|
|                       |                                    |                                    |                             |               |                   | Lower<br>Bound                                            | Upper<br>Bound |
| <i>Micro20</i>        | 20 °C                              | 25 °C                              | 0.015                       | 0.009         | 0.098             | -0.003                                                    | 0.033          |
| <b><i>Micro25</i></b> | <b>20 °C</b>                       | <b>25 °C</b>                       | <b>0.027</b>                | <b>0.009</b>  | <b>0.005</b>      | <b>0.009</b>                                              | <b>0.045</b>   |
| Tetramin              | 20 °C                              | 25 °C                              | -0.005                      | 0.009         | 0.594             | -0.024                                                    | 0.014          |

b. Adjustment for multiple comparisons: LSD (equivalent to no adjustments).

Table S3. Pairwise comparisons of total fatty acid content ( $\mu\text{g mg}^{-1}$ ) in *Chironomus* (based on estimated marginal means) fed with *Micro20*, *Micro25* or Tetramin<sup>®</sup> diet at different experimental temperatures (20 °C and 25 °C). Diets with significant difference between the experimental temperatures are bolded.

| Diet                  | (I)<br>Experimental<br>temperature | (J)<br>Experimental<br>temperature | Mean<br>Difference<br>(I-J) | Std.<br>Error | Sig. <sup>b</sup> | 95% Confidence<br>Interval for<br>Difference <sup>b</sup> |                |
|-----------------------|------------------------------------|------------------------------------|-----------------------------|---------------|-------------------|-----------------------------------------------------------|----------------|
|                       |                                    |                                    |                             |               |                   | Lower<br>Bound                                            | Upper<br>Bound |
| <b><i>Micro20</i></b> | <b>20 °C</b>                       | <b>25 °C</b>                       | <b>5.526</b>                | <b>2.456</b>  | <b>0.034</b>      | <b>0.446</b>                                              | <b>10.606</b>  |
| <b><i>Micro25</i></b> | <b>20 °C</b>                       | <b>25 °C</b>                       | <b>5.098</b>                | <b>2.456</b>  | <b>0.049</b>      | <b>0.018</b>                                              | <b>10.178</b>  |
| <b>Tetramin</b>       | <b>20 °C</b>                       | <b>25 °C</b>                       | <b>30.128</b>               | <b>2.604</b>  | <b>&lt; 0.001</b> | <b>24.740</b>                                             | <b>35.516</b>  |

b. Adjustment for multiple comparisons: LSD (equivalent to no adjustments).

Table S4. Pairwise comparisons of the dry weight ( $\text{mg ind}^{-1}$ ) in *Chironomus* (based on estimated marginal means) fed with *Micro20*, *Micro25* or Tetramin<sup>®</sup> diet at different experimental temperatures (20 °C and 25 °C). Diet with significant difference between the experimental temperatures is bolded.

| Diet                  | (I)<br>Experimental<br>temperature | (J)<br>Experimental<br>temperature | Mean<br>Difference<br>(I-J) | Std.<br>Error | Sig. <sup>b</sup> | 95% Confidence<br>Interval for<br>Difference <sup>b</sup> |                |
|-----------------------|------------------------------------|------------------------------------|-----------------------------|---------------|-------------------|-----------------------------------------------------------|----------------|
|                       |                                    |                                    |                             |               |                   | Lower<br>Bound                                            | Upper<br>Bound |
| <b><i>Micro20</i></b> | <b>20 °C</b>                       | <b>25 °C</b>                       | <b>-0.035</b>               | <b>0.014</b>  | <b>0.017</b>      | <b>-0.064</b>                                             | <b>-0.007</b>  |
| <i>Micro25</i>        | 20 °C                              | 25 °C                              | -0.023                      | 0.014         | 0.108             | -0.051                                                    | 0.005          |
| Tetramin              | 20 °C                              | 25 °C                              | 0.019                       | 0.015         | 0.208             | -0.049                                                    | 0.011          |

b. Adjustment for multiple comparisons: LSD (equivalent to no adjustments).
